# Supplementary material
Source: PubMed Central journal article supplement (PMC2793409)
Supplement: halms346678-supplement_2.pdf [file halms346678-supplement_2.pdf]

### Supplemental Table 1:

#### Quantification of intracellular CCR5 and CD4 by FACS.

| Cell Type                        | 1/85a anti-human CCR5 | 2D7 anti-human CCR5 | OKT4 anti-human CD4 |
|----------------------------------|-----------------------|---------------------|---------------------|
| T Lymphocytes                    | 95±1<br>(n=6)         | ND                  | 25±2<br>(n=3)       |
| Activated T Lymphocytes          | 89±3<br>(n=6)         | ND                  | 8±2<br>(n=3)        |
| THP-1 monocytes                  | 87±2<br>(n=6)         | 91±1<br>(n=6)       | 32±1<br>(n=3)       |
| CHO-K1 transfected with CCR5     | 89±1<br>(n=6)         | 84 ±2<br>(n=3)      | ND                  |
| CHO-K1 transfected with CCR5-YFP | 95±1<br>(n=3)         | 91±1<br>(n=3)       | ND                  |

n indicates the number of independent experiments  
(or subjects) tested in triplicates

ND: not determined

Numbers correspond to intracellular receptor (% of total ± SEM)
